# Supplementary material
Source: Springer Nature journal article supplement (https://www.springermedizin.de/resource/supplementary/12908_2008_62_MOESM2_ESM.pdf/9525342)

**A** **$C_{max}$  of plasma Calcitonin**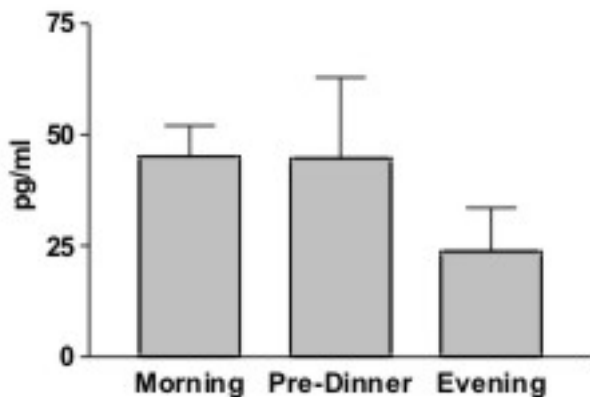**B** **$AUC_{0-4 \text{ hrs}}$  plasma Calcitonin**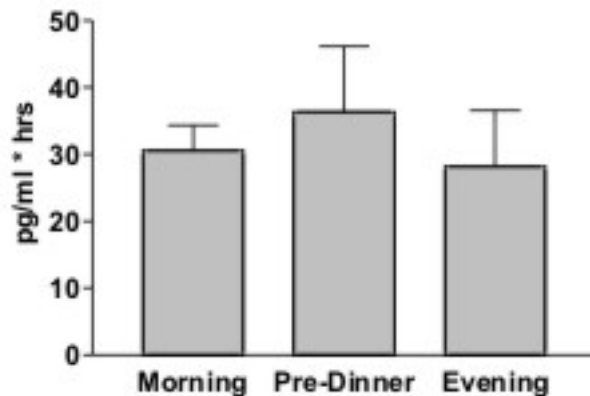

Supplement: MOESM2 [file 9525342]
